# Supplementary material for: Safety and immunogenicity of an investigational 4-component Staphylococcus aureus vaccine with or without AS03B adjuvant: Results of a randomized phase I trial
Source: PubMed Central journal article supplement — Hum Vaccin Immunother. 2015 Feb 25;11(3):620–31. doi: 10.1080/21645515.2015.1011021 (PMC4514337; doi:10.1080/21645515.2015.1011021), 2015-02-25
Supplement: khvi-11-03-1011021-s001.pdf [file khvi-11-03-1011021-s001.pdf]

**Supplementary Table 1. Summary of demographic characteristics (total vaccinated cohort)**

| <b>Characteristics</b> | <b>Parameter or category</b> | <b>5/10<br/>N=15</b> | <b>5/10AS<br/>N=15</b> | <b>10/30<br/>N=14</b> | <b>10/30AS<br/>N=14</b> | <b>Placebo<br/>N=30</b> |
|------------------------|------------------------------|----------------------|------------------------|-----------------------|-------------------------|-------------------------|
| <b>Age</b>             | Mean (range)                 | 31.1<br>(19 – 39)    | 31.9<br>(21 – 40)      | 30.9<br>(19 – 40)     | 30.6<br>(21 – 39)       | 30.1<br>(18 – 40)       |
|                        | <b>Gender</b>                | Female, n (%)        | 11 (73.3)              | 5 (33.3)              | 6 (42.9)                | 7 (50.0)                |
| <b>Race</b>            | Caucasian, n (%)             | 15 (100)             | 14 (93.3)              | 13 (92.9)             | 14 (100)                | 27 (90.0)               |
|                        | Arabic/North African, n (%)  | 0                    | 1 (6.7)                | 1 (7.1)               | 0                       | 2 (6.7)                 |
|                        | Asian, n (%)                 | 0                    | 0                      | 0                     | 0                       | 1 (3.3)                 |

5/10 = 5 µg CPS5-TT, 5 µg CPS8-TT, 10 µg AT, 10 µg ClfA

5/10AS = 5 µg CPS5-TT, 5 µg CPS8-TT, 10 µg AT, 10 µg ClfA adjuvanted with AS03<sub>B</sub>

10/30 = 10 µg CPS5-TT, 10 µg CPS8-TT, 30 µg AT, 30 µg ClfA

10/30AS = 10 µg CPS5-TT, 10 µg CPS8-TT, 30 µg AT, 30 µg ClfA adjuvanted with AS03<sub>B</sub>

N, number of patients within study group; n (%), number (percentage) of patients within the category

**Supplementary Table 2. Percentage of subjects with unsolicited adverse events reported within 30 days after each vaccine dose (total vaccinated cohort)**

|                                        | <b>5/10</b>     | <b>5/10AS</b>   | <b>10/30</b>    | <b>10/30AS</b>  | <b>Placebo</b>  |
|----------------------------------------|-----------------|-----------------|-----------------|-----------------|-----------------|
|                                        | <b>n (%)</b>    |
| <b>Doses 1 and 2<br/>(any grading)</b> | 10 (66.7)       | 14 (93.3)       | 9 (64.3)        | 13 (92.9)       | 25 (83.3)       |
| <b>Grade 3</b>                         | <b>4 (26.7)</b> | 0 (0.0)         | <b>1 (7.1)</b>  | <b>2 (14.3)</b> | <b>6 (20.0)</b> |
| Abdominal pain                         | <b>1 (6.7)</b>  | 0 (0.0)         | 0 (0.0)         | 0 (0.0)         | 0 (0.0)         |
| Vomiting                               | 0 (0.0)         | 0 (0.0)         | 0 (0.0)         | <b>1 (7.1)</b>  | 0 (0.0)         |
| Fatigue                                | <b>1 (6.7)</b>  | 0 (0.0)         | 0 (0.0)         | 0 (0.0)         | <b>1 (3.3)</b>  |
| Hangover                               | 0 (0.0)         | 0 (0.0)         | 0 (0.0)         | 0 (0.0)         | <b>1 (3.3)</b>  |
| Nasopharyngitis                        | 0 (0.0)         | 0 (0.0)         | 0 (0.0)         | 0 (0.0)         | <b>1 (3.3)</b>  |
| Pharyngitis                            | <b>1 (6.7)</b>  | 0 (0.0)         | 0 (0.0)         | 0 (0.0)         | <b>1 (3.3)</b>  |
| Rhinotracheitis                        | 0 (0.0)         | 0 (0.0)         | 0 (0.0)         | 0 (0.0)         | <b>1 (3.3)</b>  |
| Tracheitis                             | 0 (0.0)         | 0 (0.0)         | 0 (0.0)         | <b>1 (7.1)</b>  | 0 (0.0)         |
| Muscle spasms                          | 0 (0.0)         | 0 (0.0)         | 0 (0.0)         | 0 (0.0)         | <b>1 (3.3)</b>  |
| Headache                               | <b>1 (6.7)</b>  | 0 (0.0)         | 0 (0.0)         | 0 (0.0)         | 0 (0.0)         |
| Intercostal neuralgia                  | 0 (0.0)         | 0 (0.0)         | <b>1 (7.1)</b>  | 0 (0.0)         | 0 (0.0)         |
| <b>dose 3<br/>(any grading)</b>        | 6 (66.7)        | 6 (66.7)        | 2 (40.0)        | 6 (50.0)        | 9 (42.9)        |
| <b>Grade 3</b>                         | <b>2 (22.2)</b> | <b>2 (22.2)</b> | <b>2 (40.0)</b> | <b>2 (16.7)</b> | <b>2 (9.5)</b>  |
| Abdominal pain                         | <b>1 (11.1)</b> | 0 (0.0)         | 0 (0.0)         | 0 (0.0)         | 0 (0.0)         |
| Ear infection                          | 0 (0.0)         | <b>1 (11.1)</b> | 0 (0.0)         | <b>1 (8.3)</b>  | 0 (0.0)         |
| Gastroenteritis                        | 0 (0.0)         | <b>1 (11.1)</b> | 0 (0.0)         | 0 (0.0)         | 0 (0.0)         |
| Pharyngitis                            | <b>1 (11.1)</b> | 0 (0.0)         | 0 (0.0)         | 0 (0.0)         | 0 (0.0)         |
| Rhinotracheitis                        | <b>1 (11.1)</b> | 0 (0.0)         | 0 (0.0)         | 0 (0.0)         | 0 (0.0)         |
| Ligament sprain                        | <b>1 (11.1)</b> | 0 (0.0)         | 0 (0.0)         | 0 (0.0)         | <b>1 (4.8)</b>  |
| Wound                                  | 0 (0.0)         | 0 (0.0)         | <b>1 (20.0)</b> | 0 (0.0)         | 0 (0.0)         |
| Coccydynia                             | 0 (0.0)         | 0 (0.0)         | 0 (0.0)         | <b>1 (8.3)</b>  | 0 (0.0)         |
| Cholelithiasis                         | 0 (0.0)         | 0 (0.0)         | 0 (0.0)         | 0 (0.0)         | <b>1 (4.8)</b>  |
| Haematoma                              | 0 (0.0)         | 0 (0.0)         | 1 (20.0)        | 0 (0.0)         | 0 (0.0)         |

5/10 = 5µg CPS5-TT, 5µg CPS8-TT, 10µg AT, 10µg ClfA

5/10AS = 5µg CPS5-TT, 5µg CPS8-TT, 10µg AT, 10µg ClfA adjuvanted with AS03<sub>B</sub>

10/30 = 10µg CPS5-TT, 10µg CPS8-TT, 30µg AT, 30µg ClfA

10/30AS = 10µg CPS5-TT, 10µg CPS8-TT, 30µg AT, 30µg ClfA adjuvanted with AS03<sub>B</sub>

n/%, number/percentage of subjects reporting the symptom at least once

**Supplementary Table 3. Change of carriage status from baseline (according-to-protocol cohort for immunogenicity)**

| Group      | Timing     | Carriage post vaccination | Non carrier at baseline | Intermediate carrier at baseline | Carrier at baseline |   |
|------------|------------|---------------------------|-------------------------|----------------------------------|---------------------|---|
|            |            |                           | N = 46                  | N = 9                            | N = 17              |   |
|            |            |                           | n                       | n                                | n                   |   |
| 5/10       | PI(D30)    | Non Carrier               | 8                       | -                                | 1                   |   |
|            |            | Carrier                   | 0                       | -                                | 2                   |   |
|            | PII(D60)   | Non Carrier               | 7                       | -                                | 1                   |   |
|            |            | Carrier                   | 0                       | -                                | 2                   |   |
|            | PII(D180)  | Non Carrier               | 5                       | -                                | 1                   |   |
|            |            | Carrier                   | 1                       | -                                | 2                   |   |
|            | PIII(D210) | Non Carrier               | 5                       | -                                | 0                   |   |
|            |            | Carrier                   | 1                       | -                                | 3                   |   |
|            | PIII(D540) | Non Carrier               | 5                       | -                                | 1                   |   |
|            |            | Carrier                   | 1                       | -                                | 2                   |   |
|            | 5/10AS     | PI(D30)                   | Non Carrier             | 7                                | 0                   | 1 |
|            |            |                           | Carrier                 | 0                                | 1                   | 3 |
| PII(D60)   |            | Non Carrier               | 7                       | 0                                | 0                   |   |
|            |            | Carrier                   | 0                       | 1                                | 4                   |   |
| PII(D180)  |            | Non Carrier               | 5                       | 0                                | 2                   |   |
|            |            | Carrier                   | 0                       | 1                                | 1                   |   |
| PIII(D210) |            | Non Carrier               | 5                       | 1                                | 1                   |   |
|            |            | Carrier                   | 0                       | 0                                | 2                   |   |
| PIII(D540) |            | Non Carrier               | 5                       | 0                                | 0                   |   |
|            |            | Carrier                   | 0                       | 1                                | 3                   |   |
| 10/30      |            | PI(D30)                   | Non Carrier             | 8                                | 1                   | 0 |
|            |            |                           | Carrier                 | 0                                | 0                   | 3 |
|            | PII(D60)   | Non Carrier               | 7                       | 1                                | 0                   |   |
|            |            | Carrier                   | 1                       | 0                                | 3                   |   |
|            | PII(D180)  | Non Carrier               | 4                       | -                                | -                   |   |
|            |            | Carrier                   | 0                       | -                                | -                   |   |
|            | PIII(D210) | Non Carrier               | 4                       | -                                | -                   |   |
|            |            | Carrier                   | 0                       | -                                | -                   |   |
|            | PIII(D540) | Non Carrier               | 4                       | -                                | -                   |   |
|            |            | Carrier                   | 0                       | -                                | -                   |   |
|            | 10/30AS    | PI(D30)                   | Non Carrier             | 9                                | 2                   | 0 |
|            |            |                           | Carrier                 | 1                                | 0                   | 1 |
| PII(D60)   |            | Non Carrier               | 7                       | 2                                | 0                   |   |
|            |            | Carrier                   | 3                       | 0                                | 1                   |   |
| PII(D180)  |            | Non Carrier               | 7                       | 1                                | 0                   |   |
|            |            | Carrier                   | 2                       | 1                                | 1                   |   |
| PIII(D210) |            | Non Carrier               | 8                       | 2                                | 0                   |   |

|        |            |             |    |   |   |
|--------|------------|-------------|----|---|---|
|        |            | Carrier     | 1  | 0 | 1 |
|        | PIII(D540) | Non Carrier | 6  | 2 | 0 |
|        |            | Carrier     | 2  | 0 | 1 |
| SALINE | PI(D30)    | Non Carrier | 13 | 3 | 1 |
|        |            | Carrier     | 0  | 2 | 5 |
|        | PII(D60)   | Non Carrier | 12 | 4 | 1 |
|        |            | Carrier     | 1  | 1 | 5 |
|        | PII(D180)  | Non Carrier | 12 | 4 | 1 |
|        |            | Carrier     | 1  | 0 | 3 |
|        | PIII(D210) | Non Carrier | 12 | 3 | 2 |
|        |            | Carrier     | 1  | 1 | 2 |
|        | PIII(D540) | Non Carrier | 10 | 4 | 1 |
|        |            | Carrier     | 2  | 0 | 1 |

5/10 = 5 µg CPS5-TT, 5 µg CPS8-TT, 10 µg AT, 10 µg ClfA

5/10AS = 5 µg CPS5-TT, 5 µg CPS8-TT, 10 µg AT, 10 µg ClfA adjuvanted with AS03<sub>B</sub>

10/30 = 10 µg CPS5-TT, 10 µg CPS8-TT, 30 µg AT, 30 µg ClfA

10/30AS = 10 µg CPS5-TT, 10 µg CPS8-TT, 30 µg AT, 30 µg ClfA adjuvanted with AS03<sub>B</sub>

N, number of subjects in the specified carriage status at baseline with at least one post vaccination result available; n, number of subjects in the specified carriage status at post vaccination time point; PI(D30), 30 days post-dose 1; PII(D60), 30 days post-dose 2; PII(D180), pre-dose 3; PIII(D210), 30 days post-dose 3; PIII(D360), 1 year post-dose 1 or 6 months post-dose 3; PIII(D540), 1.5 year post-dose 1 or 1 year post-dose 3

Non carrier at baseline = swab samples negative for *S. aureus* at screening and at Day 0

Intermediate carrier at baseline = *S. aureus* detected only at one baseline time point (either screening or Day 0)

Carrier at baseline = *S. aureus* detected in at least one swab sample at screening and at Day 0, whatever the swab sample type

Non-carrier at post vaccination time point = swab samples negative for *S. aureus* at the considered time point

Carrier at post vaccination time point = *S. aureus* detected in at least one swab sample at the considered time point

Supplementary figure 1. Geometric mean titers for functional assays: OPA for CPS5 (panel A), inhibition assay for  $\alpha$ -toxin (panel B), inhibition assay for ClfA (initial test, panel C and new test, panel D) (according-to-protocol cohort for immunogenicity)

A

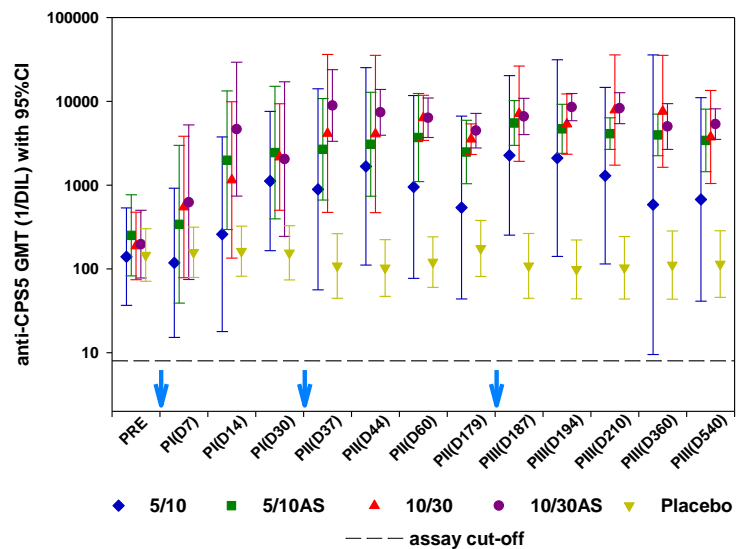

B

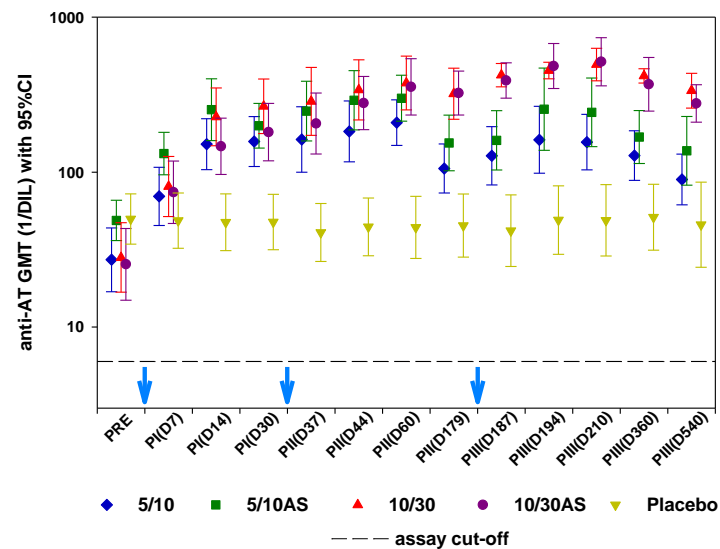

**C**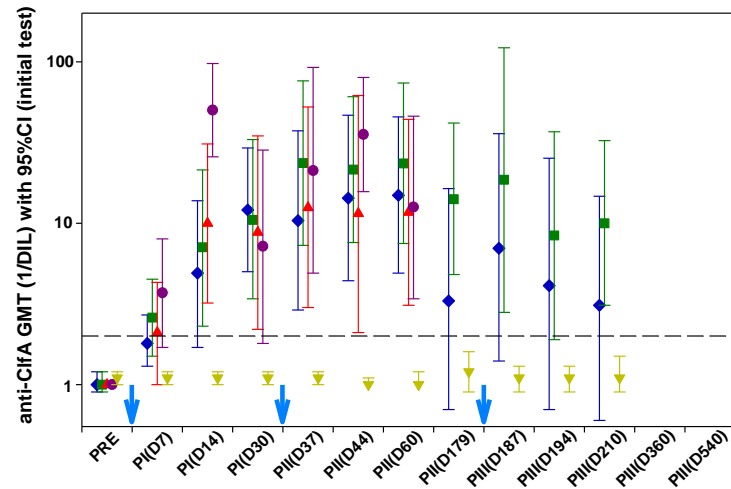**D**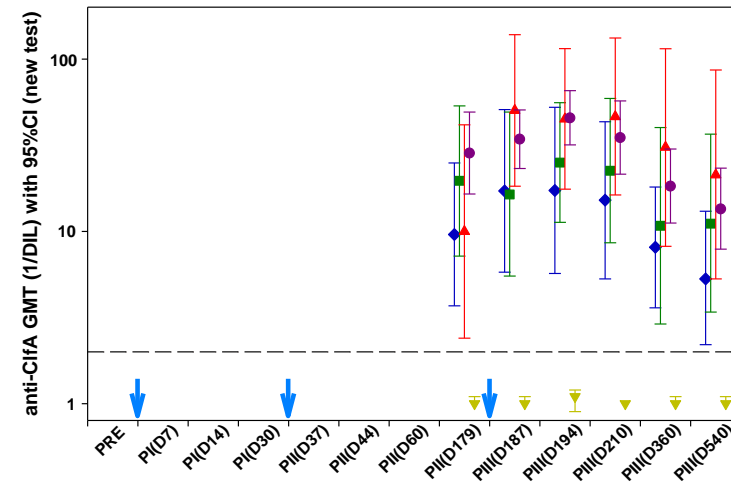

5/10 = 5  $\mu$ g CPS5-TT, 5  $\mu$ g CPS8-TT, 10  $\mu$ g AT, 10  $\mu$ g ClfA

5/10AS = 5  $\mu$ g CPS5-TT, 5  $\mu$ g CPS8-TT, 10  $\mu$ g AT, 10  $\mu$ g ClfA adjuvanted with AS03<sub>B</sub>

10/30 = 10  $\mu$ g CPS5-TT, 10  $\mu$ g CPS8-TT, 30  $\mu$ g AT, 30  $\mu$ g ClfA

10/30AS = 10  $\mu$ g CPS5-TT, 10  $\mu$ g CPS8-TT, 30  $\mu$ g AT, 30  $\mu$ g ClfA adjuvanted with AS03<sub>B</sub>

GMT, geometric mean titer; 95% CI, 95% confidence interval; CPS5, capsular polysaccharides type 5; TT, , tetanus toxoid; AT,  $\alpha$ -toxin; ClfA, clumping factor A; PRE, pre-dose 1; PI(D7), 7 days post-dose 1; PI(D14), 14 days post-dose 1; PI(D30), 30 days post-dose 1; PII(D37), 7 days post-dose 2; PII(D44), 14 days post-dose 2; PII(D60), 30 days post-dose 2; PII(D179), pre-dose 3; PIII(D187), 7 days post-dose 3; PIII(D194), 14 days post-dose 3; PIII(D210), 30 days post-dose 3; PIII(D360), 1 year post-dose 1 or 6 months post-dose 3; PIII(D540), 1.5 year post-dose 1 or 1 year post-dose 3.

The cut-off values for these assays (dashed line) were: 8 1/DIL for OPA (CPS5), 6 1/DIL for the inhibition assay ( $\alpha$ -toxin) and 2 1/DIL for the inhibition assay (ClfA); Blue arrows indicate days of vaccine or placebo administration.

**Supplementary figure 2. Frequency (%) of *S. aureus* tetanus toxoid-specific CD4<sup>+</sup> T-cells expressing at least 2 markers amongst IL-2, IFN- $\gamma$ , IL-13, IL-17, TNF- $\alpha$  and CD40L prior and after each vaccination (according-to-protocol cohort for immunogenicity).**

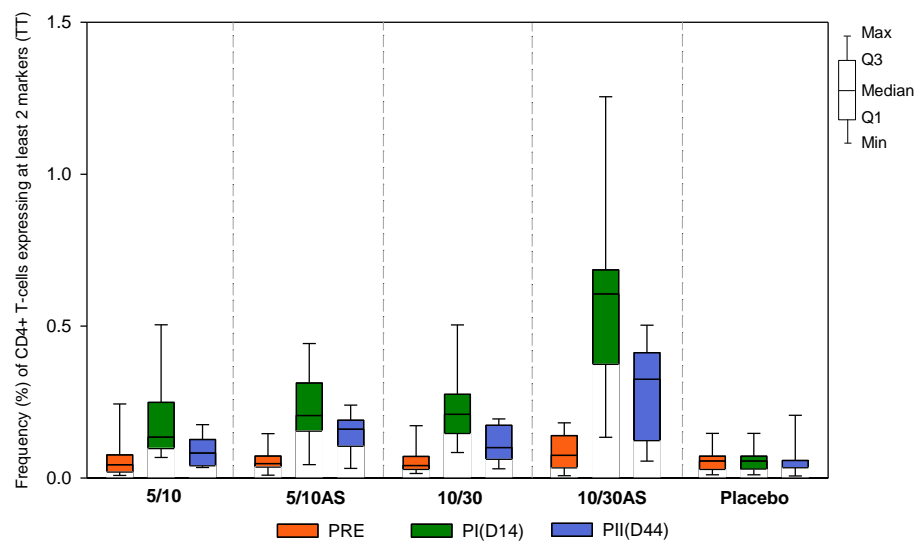

5/10 = 5  $\mu$ g CPS5-TT, 5  $\mu$ g CPS8-TT, 10  $\mu$ g AT, 10  $\mu$ g ClfA

5/10AS = 5  $\mu$ g CPS5-TT, 5  $\mu$ g CPS8-TT, 10  $\mu$ g AT, 10  $\mu$ g ClfA adjuvanted with AS03<sub>B</sub>

10/30 = 10  $\mu$ g CPS5-TT, 10  $\mu$ g CPS8-TT, 30  $\mu$ g AT, 30  $\mu$ g ClfA

10/30AS = 10  $\mu$ g CPS5-TT, 10  $\mu$ g CPS8-TT, 30  $\mu$ g AT, 30  $\mu$ g ClfA adjuvanted with AS03<sub>B</sub>

TT, tetanus toxoid, PRE, pre-dose 1; PI(D14), 14 days post-dose 1; PII(D44), 14 days post-dose 2; Min/Max, Minimum/Maximum; Q1, Q3, First and third quartiles
